# Supplementary material for: Multi-octave supercontinuum generation from mid-infrared filamentation in a bulk crystal
Source: PubMed Central journal article supplement — Nat Commun. 2012 May 1;3:807–. doi: 10.1038/ncomms1816 (PMC4354296; doi:10.1038/ncomms1816), 2012-05-01
Supplement: ncomms1816-s1.pdf [file ncomms1816-s1.pdf]

## Supplementary Information

# Multi-octave supercontinuum generation from mid-infrared filamentation in a bulk crystal

F. Silva<sup>1,\*</sup>, D. R. Austin<sup>1</sup>, A. Thai<sup>1</sup>, M. Baudisch<sup>1</sup>, M. Hemmer<sup>1</sup>, D. Faccio<sup>2</sup>, A. Couairon<sup>3</sup>, J. Biegert<sup>1,4</sup>

<sup>1</sup>ICFO-Institut de Ciències Fotoniques, 08860 Castelldefels (Barcelona), Spain

<sup>2</sup>School of Engineering and Physical Sciences, Heriot-Watt University, Edinburgh, UK

<sup>3</sup>Centre de Physique Théorique, CNRS, École Polytechnique, 91128 Palaiseau, France

<sup>4</sup>ICREA - Institució Catalana de Recerca i Estudis Avançats, 08010 Barcelona, Spain

## Supplementary Figures

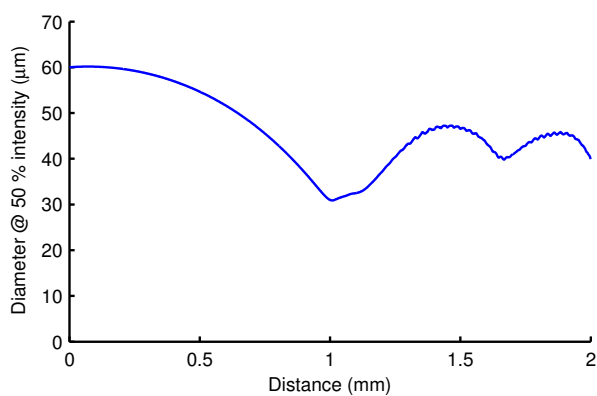

Supplementary Figure S1: *Simulated beam diameter*. Simulated beam diameter at 50% intensity limit as function of propagation distance in the YAG plate.

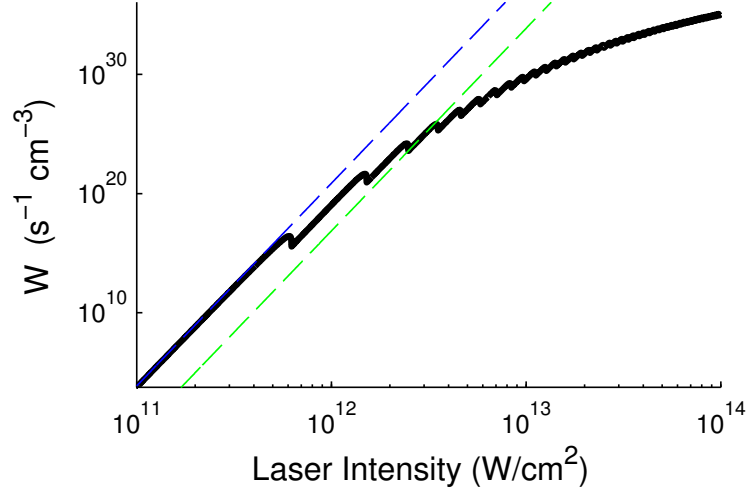

Supplementary Figure S2: *Optical field ionization rate for YAG used in numerical calculations.* Optical field ionization rate for YAG calculated from the Keldysh formulation for a central wavelength of  $3.1\ \mu\text{m}$ . The blue dashed lines indicate the low-intensity asymptote describing multiphoton ionization  $W_{MPI} = \sigma_K I^K \rho_{nt}$  where  $K = 17$ ,  $\sigma_{17} = 1 \times 10^{-206} \text{s}^{-1} \text{cm}^{34} \text{W}^{-17}$  and  $\rho_{nt} = 7 \times 10^{22} \text{cm}^{-3}$ . The green dashed line shows an example of MPI rates (cross section coefficient  $\sigma_{17} = 1 \times 10^{-210} \text{s}^{-1} \text{cm}^{34} \text{W}^{-17}$ ) for which the Fish tail at  $550\ \text{nm}$  clearly appears in numerically simulated angular spectra.
